# Supplementary material for: Gata2 cis-element is required for hematopoietic stem cell generation in the mammalian embryo
Source: PubMed Central journal article supplement — J Exp Med. 2013 Dec 16;210(13):2833–42. doi: 10.1084/jem.20130733 (PMC3865483; doi:10.1084/jem.20130733), 2013-12-16
Supplement: supp_jem.20130733_JEM_20130733_sm.pdf [file supp_jem.20130733_JEM_20130733_sm.pdf]

## SUPPLEMENTAL MATERIAL

Gao et al., <http://www.jem.org/cgi/content/full/jem.20130733/DC1>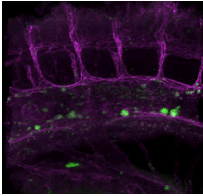

**Video 1. The +9.5 element is required for HSC genesis in the AGM.** Whole-mount three-dimensional confocal imaging of +9.5<sup>+/+</sup> embryos at E10.5 with c-Kit (green) and CD31 (magenta) antibodies. Three-dimensional reconstructions were generated from z-stacks (100–120 optional sections) and the video is displayed at 5 frames per second. Related to Fig. 2.

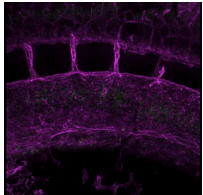

**Video 2. The +9.5 element is required for HSC genesis in the AGM.** Whole-mount three-dimensional confocal imaging of +9.5<sup>-/-</sup> embryos at E10.5 with c-Kit (green) and CD31 (magenta) antibodies. Three-dimensional reconstructions were generated from z-stacks (100–120 optional sections) and the video is displayed at 5 frames per second. Related to Fig. 2.

**Table S1.** +9.5 *cis*-regulatory element deletion does not alter expression of components of Notch, Wnt and BMP4 pathways

| <b>Notch Pathway</b> | <b>Gene Name</b>   | <b>log<sub>2</sub> fold change</b> |
|----------------------|--------------------|------------------------------------|
| Receptor             | <i>Notch1</i>      | 0.06                               |
|                      | <i>Notch2</i>      | -0.19                              |
|                      | <i>Notch3</i>      | 0.35                               |
|                      | <i>Notch4</i>      | 0.84                               |
| Ligand               | <i>Dll1</i>        | 0.31                               |
|                      | <i>Dll3</i>        | 0.40                               |
|                      | <i>Dll4</i>        | 0.59                               |
|                      | <i>Jag1</i>        | 0.51                               |
|                      | <i>Jag2</i>        | -0.27                              |
|                      | S2 cleavage        | <i>Adam10</i>                      |
|                      | <i>Adam17</i>      | -0.23                              |
| S3 cleavage          | <i>Psen1</i>       | -0.25                              |
|                      | <i>Psen2</i>       | -0.78                              |
|                      | <i>Ncstn</i>       | -0.02                              |
|                      | <i>Aph1a</i>       | -0.20                              |
|                      | <i>Aph1b</i>       | 0.42                               |
|                      | <i>Aph1c</i>       | -0.37                              |
|                      | <i>Psene</i>       | -0.03                              |
| DNA binding complex  | <i>Rbpj</i>        | -0.37                              |
|                      | <i>Maml1</i>       | -0.07                              |
|                      | <i>Maml2</i>       | 0.09                               |
|                      | <i>Maml3</i>       | -0.16                              |
| <b>BMP4 Pathway</b>  |                    |                                    |
| Ligand               | <i>Bmp4</i>        | 0.50                               |
| Receptor             | <i>Bmpr1a</i>      | 0.63                               |
|                      | <i>Bmpr1b</i>      | 0.50                               |
|                      | <i>Bmpr2</i>       | 0.24                               |
| Complex              | <i>Smad1</i>       | 0.45                               |
|                      | <i>Smad2</i>       | 0.02                               |
|                      | <i>Smad3</i>       | 0.03                               |
|                      | <i>Smad4</i>       | 0.13                               |
|                      | <i>Smad5</i>       | 0.33                               |
|                      | <i>Smad6</i>       | 0.29                               |
|                      | <i>Smad7</i>       | 0.21                               |
|                      | <i>Smad9</i>       | 0.26                               |
|                      | <b>Wnt Pathway</b> |                                    |
| Ligand               | <i>Wnt1</i>        | 0.21                               |
|                      | <i>Wnt2</i>        | 0.21                               |
|                      | <i>Wnt2b</i>       | 0.50                               |
|                      | <i>Wnt3</i>        | 1.04                               |
|                      | <i>Wnt3a</i>       | 2.43                               |
|                      | <i>Wnt4</i>        | 0.46                               |
|                      | <i>Wnt5a</i>       | 0.41                               |
|                      | <i>Wnt5b</i>       | 0.55                               |
|                      | <i>Wnt6</i>        | 0.34                               |
|                      | <i>Wnt7a</i>       | 0.72                               |
|                      | <i>Wnt7b</i>       | 0.11                               |
|                      | <i>Wnt8a</i>       | 2.43                               |
|                      | <i>Wnt8b</i>       | 1.35                               |
|                      | <i>Wnt9a</i>       | 0.24                               |
|                      | <i>Wnt9b</i>       | 0.51                               |
|                      | <i>Wnt10a</i>      | 0.56                               |
| <i>Wnt10b</i>        | 0.60               |                                    |
| <i>Wnt11</i>         | 0.58               |                                    |
| <i>Wnt16</i>         | 0.66               |                                    |
| Receptor             | <i>Fzd1</i>        | 0.19                               |
|                      | <i>Fzd2</i>        | 0.44                               |

|                     | Gene Name      | log <sub>2</sub> fold change |
|---------------------|----------------|------------------------------|
|                     | <i>Fzd3</i>    | 0.70                         |
|                     | <i>Fzd4</i>    | 0.49                         |
|                     | <i>Fzd5</i>    | 0.54                         |
|                     | <i>Fzd6</i>    | 0.80                         |
|                     | <i>Fzd7</i>    | 0.22                         |
|                     | <i>Fzd8</i>    | 0.26                         |
|                     | <i>Fzd9</i>    | -0.54                        |
|                     | <i>Fzd10</i>   | 0.89                         |
|                     | <i>Lrp5</i>    | -0.14                        |
|                     | <i>Lrp6</i>    | 0.14                         |
| Complex             | <i>Dvl1</i>    | 0.21                         |
|                     | <i>Dvl2</i>    | 0.03                         |
|                     | <i>Dvl3</i>    | 0.11                         |
|                     | <i>Axin1</i>   | -0.10                        |
|                     | <i>Axin2</i>   | 0.28                         |
|                     | <i>Csnk1a1</i> | -0.06                        |
|                     | <i>Csnk1d</i>  | 0.01                         |
|                     | <i>Csnk1e</i>  | 0.23                         |
|                     | <i>Csnk1g1</i> | 0.08                         |
|                     | <i>Csnk1g2</i> | 0.04                         |
|                     | <i>Csnk1g3</i> | 0.32                         |
|                     | <i>Gsk3a</i>   | -0.11                        |
|                     | <i>Gsk3b</i>   | 0.14                         |
|                     | <i>Apc</i>     | 0.18                         |
|                     | <i>Ctnnb1</i>  | 0.36                         |
| DNA-binding complex | <i>Tcf3</i>    | 0.00                         |
|                     | <i>Tcf4</i>    | 0.30                         |
|                     | <i>Tcf7</i>    | 0.46                         |
|                     | <i>Tcf12</i>   | 0.31                         |
|                     | <i>Tcf15</i>   | 0.84                         |
|                     | <i>Tcf19</i>   | 0.33                         |
|                     | <i>Tcf20</i>   | -0.06                        |
|                     | <i>Tcf21</i>   | 0.64                         |
|                     | <i>Tcf23</i>   | 1.00                         |
|                     | <i>Tcf25</i>   | -0.05                        |
|                     | <i>Tcf15</i>   | 0.81                         |
|                     | <i>Tcf711</i>  | 0.48                         |
|                     | <i>Tcf712</i>  | 0.07                         |
|                     | <i>Tle1</i>    | 0.28                         |
|                     | <i>Tle2</i>    | 0.25                         |
|                     | <i>Tle3</i>    | -0.16                        |
|                     | <i>Tle4</i>    | 0.15                         |
|                     | <i>Tle6</i>    | -0.24                        |

**Table S2.** Primers for genotyping and RT-PCR

| Primer                | Sequence                          |
|-----------------------|-----------------------------------|
| +9.5 flanking Forward | 5'-ATGTCCTTTCGGATCTCCTGCC-3'      |
| +9.5 flanking Reverse | 5'-GGTAAACAGAGCGCTACTCCTGTGTGT-3' |
| 18S rRNA Forward      | 5'-CGCCGCTAGAGGTGAAATTCT-3'       |
| 18S rRNA Reverse      | 5'-CGAACCTCCGACTTTCGTTCT-3'       |
| Gata2 Forward         | 5'-GCAGAGAAGCAAGGCTCGC-3'         |
| Gata2 Reverse         | 5'-CAGTTGACACACTCCCGGC-3'         |
| c-Kit Forward         | 5'-AGCAATGGCCTCACGAGTTCTA-3'      |
| c-Kit Reverse         | 5'-CCAGGAAAAGTTTGGCAGGAT-3'       |
| Myb Forward           | 5'-CGAAGACCCTGAGAAGGAAA-3'        |
| Myb Reverse           | 5'-GCTGCAAGTGTGGTTCTGTG-3'        |
| Mpl Forward           | 5'-ACTTTGATCCAGCGGGTGCT-3'        |
| Mpl Reverse           | 5'-CAGGAAGTCACTGATTCAG-3'         |
| Gfi1 Forward          | 5'-TCCGAGTTCGAGGACTTTTG-3'        |
| Gfi1 Reverse          | 5'-CATGCATAGGGCTTGAAAGG-3'        |
| Gfi1b Forward         | 5'-AGGAGCGGGAGATGTTGCT-3'         |
| Gfi1b Reverse         | 5'-GGGTGACTCAGAGAGTGGTGATT-3'     |
| Runx1 Forward         | 5'-TCACTGGCGCTGCAACAA-3'          |
| Runx1 Reverse         | 5'-TCTGCCGAGTAGTTTTTCATCGTT-3'    |
| Lyl1 Forward          | 5'-AAGCGCAGACCAAGCCATAG-3'        |
| Lyl1 Reverse          | 5'-AGCGCTCACGGCTGTTG-3'           |
| Ikzf1 Forward         | 5'-CGGGCATGTACCCAGTCATTA-3'       |
| Ikzf1 Reverse         | 5'-GCTCCTATCTTGACAGGTCTTC-3'      |
| Sfpi1 Forward         | 5'-GGCAGCGATGGAGAAAGC-3'          |
| Sfpi1 Reverse         | 5'-GGACATGGTGTGCGGAGAA-3'         |
| TAL1 Forward          | 5'-GAGGCCCTCCCATATGAGA-3'         |
| TAL1 Reverse          | 5'-GCGCCGCACTACTTTGGT-3'          |
| Bex6 Forward          | 5'-CAGGAGACAGAAGCCAAGAGAAA-3'     |
| Bex6 Reverse          | 5'-TGAGGAACCACTTGAAAACCT-3'       |
| Gpr56 Forward         | 5'-CTCTGCTCCAGGAGAAAGTCA-3'       |
| Gpr56 Reverse         | 5'-GCGGACAGCAGGTTTATGT-3'         |
| Mfsd2b Forward        | 5'-CCCAGATGTAGCTCGCCTCTA-3'       |
| Mfsd2b Reverse        | 5'-GCAGACTTCCACACACAGGATAAGT-3'   |
| Slc35d3 Forward       | 5'-GGACCCGGCCATGGT-3'             |
| Slc35d3 Reverse       | 5'-TCATGGCACAGCCGATCA-3'          |
| Fcho1 Forward         | 5'-TGAGGTCTCTACCATTTGTGA-3'       |
| Fcho1 Reverse         | 5'-TTGGCCCTTTCCTAATGAA-3'         |
| Lin28b Forward        | 5'-CCTGCAAAAGAGAAAGCCAAA-3'       |
| Lin28b Reverse        | 5'-CACAGTCCACATCTGATCCATCA-3'     |
| Gpr65 Forward         | 5'-CTTACCCCTTCCACGTGAT-3'         |
| Gpr65 Reverse         | 5'-ACGTTTATGTCGCGCTCTAA-3'        |
| Hhex Forward          | 5'-TCGCCGAGCTAAATGGAGAA-3'        |
| Hhex Reverse          | 5'-CAACGCATCCTTTTTGTTGCT-3'       |
| Mmrn1 Forward         | 5'-TTTACCAAGTGGAAAGAGTTCTTGT-3'   |
| Mmrn1 Reverse         | 5'-GGATGTCTTCTGAGATCTTCTGGAA-3'   |
| Cdk6 Forward          | 5'-TGCTCAACCCATCGAGAAGTT-3'       |
| Cdk6 Reverse          | 5'-TCAGGCATTTCAGAAGTAGGTCITT-3'   |
